# Effects of an Early Experience of Reward through Maternal Contact or Its Denial on Laterality of Protein Expression in the Developing Rat Hippocampus

Androniki Raftogianni<sup>1</sup>, Antonios Stamatakis<sup>1</sup>, Angeliki Papadopoulou<sup>2</sup>, Konstantinos Vougas<sup>2</sup>, Athanasios K. Anagnostopoulos<sup>2</sup>, Fotini Stylianopoulou<sup>1\*</sup>, George Th. Tsangaris<sup>2</sup>

**1** Laboratory of Biology-Biochemistry, Department of Basic Sciences, School of Health Sciences, University of Athens, Athens, Greece, **2** Biomedical Research Foundation of the Academy of Athens (BRFAA); Proteomics Research Unit, Athens, Greece

## Abstract

Laterality is a basic characteristic of the brain which is detectable early in life. Although early experiences affect laterality of the mature brain, there are no reports on their immediate neurochemical effects during neonatal life, which could provide evidence as to the mechanisms leading to the lateralized brain. In order to address this issue, we determined the differential protein expression profile of the left and right hippocampus of 13-day-old rat control (CTR) pups, as well as following exposure to an early experience involving either receipt (RER) or denial (DER) of the expected reward of maternal contact. Proteomic analysis was performed by 2-dimensional polyacrylamide gel electrophoresis (PAGE) followed by mass spectrometry. The majority of proteins found to be differentially expressed either between the three experimental groups (DER, RER, CTR) or between the left and right hemisphere were cytoskeletal (34%), enzymes of energy metabolism (32%), and heat shock proteins (17%). In all three groups more proteins were up-regulated in the left compared to the right hippocampus. Tubulins were found to be most often up-regulated, always in the left hippocampus. The differential expression of  $\beta$ -tubulin,  $\beta$ -actin, dihydropyrimidinase like protein 1, glial fibrillary acidic protein (GFAP) and Heat Shock protein 70 revealed by the proteomic analysis was in general confirmed by Western blots. Exposure to the early experience affected brain asymmetry: In the RER pups the ratio of proteins up-regulated in the left hippocampus to those in the right was 1.8, while the respective ratio was 3.6 in the CTR and 3.4 in the DER. Our results could contribute to the elucidation of the cellular mechanisms mediating the effects of early experiences on the vulnerability for psychopathology, since proteins shown in our study to be differentially expressed (e.g. tubulins, dihydropyrimidinase like proteins, 14-3-3 protein, GFAP, ATP synthase,  $\alpha$ -internexin) have also been identified in proteomic analyses of post-mortem brains from psychiatric patients.

**Citation:** Raftogianni A, Stamatakis A, Papadopoulou A, Vougas K, Anagnostopoulos AK, et al. (2012) Effects of an Early Experience of Reward through Maternal Contact or Its Denial on Laterality of Protein Expression in the Developing Rat Hippocampus. PLoS ONE 7(10): e48337. doi:10.1371/journal.pone.0048337

**Editor:** Allan Siegel, University of Medicine & Dentistry of NJ - New Jersey Medical School, United States of America

**Received:** May 29, 2012; **Accepted:** September 24, 2012; **Published:** October 31, 2012

**Copyright:** © 2012 Raftogianni et al. This is an open-access article distributed under the terms of the Creative Commons Attribution License, which permits unrestricted use, distribution, and reproduction in any medium, provided the original author and source are credited.

**Funding:** The study was supported by an "IKY" (Hellenic State Foundation for Scholarships) scholarship to A.R. and by the special account for research of the University of Athens (Greece); grant number 70/4/7825 to F.S. and special account for research of the University of Athens (Greece); grant number 70/4/8923 to A.S. The funders had no role in study design, data collection and analysis, decision to publish, or preparation of the manuscript.

**Competing Interests:** The authors have declared that no competing interests exist.

\* E-mail: fstilian@nurs.uoa.gr

## Introduction

Early experiences have a determinant role on brain development and thus affect brain function and expression of behavior, as well as vulnerability for psychopathology, throughout the lifespan. Although this has been clearly documented in both humans and animal models through a large number of studies [1,2,3,4], many questions as to the underlying mechanisms mediating the effects of early experiences on the developing brain still remain unanswered. In an effort to address such a question in the present study we investigated the effect of exposure to an early experience involving receipt or denial of the expected reward of maternal contact, a model developed in our laboratory [5,6], on the proteome of the hippocampus, of 13-day-old rat pups. More specifically, rat pups on postnatal days 10–13 are exposed to a T-maze, one arm of which leads to the mother-containing cage to which pups of the one group (Receiving Expected Reward-RER) are permitted access, upon reaching its entrance. In contrast, pups of the other group are denied entry and thus the expected reward of contact

with the mother (Denied Expected Reward-DER). These two experiences have been shown to affect the pups at the cellular level of the brain, as well as the behavioral, both immediately after the experience on postnatal day 13 [5,6] and in adulthood [6,7]. In particular the DER experience has been shown to lead to increased activation of the hippocampus of 13-day-old pups [5], as well as in adulthood, following the Morris Water Maze, a hippocampus-dependent behavioral task, in which the DER animals exhibited better mnemonic abilities [6]. Based on these results in the present study we focused on the analysis of the hippocampal proteome of 13-day-old DER, RER, and control (not exposed to any early experience) rat pups, in an effort to identify proteins differentially expressed as a result of the early experience. Indeed previous studies have shown that maternal separation in rats [8,9] alters the adult hippocampal proteome. However it must be pointed out that in contrast to this early experience, which is highly distressful, in our model the two experiences can be seen as more or less challenging ones,

resembling more normally occurring environmental events during postnatal development. It is worth noting that the DER experience could be considered as analogous to the human situation where the mother is present but unavailable to the child [10].

It is worth noting that we analyzed separately the left and the right hemisphere of the rat pup brain, in order to address the issue of laterality at this neonatal stage of life, and in order to investigate the possible effects of this early experience on brain laterality. Laterality, i.e. differences in function and structure between the two brain hemispheres is quite prevalent in the animal kingdom [11,12,13,14]. In the human it is particularly pronounced; the control of language being localized in the left hemisphere in more than 95% of individuals [15]. A structural corollary of this functional brain asymmetry is the finding that the left planum temporale is larger than the right [16]. The hippocampus is among the brain areas in humans showing laterality [17], a property which is of seminal importance, since abnormal left-right hippocampal asymmetry has been reported in psychopathological states, for example in schizophrenia [18,19] and autism [20].

In the adult rat or mouse brain a number of biochemical parameters have been shown to be lateralized, such as GABA binding sites in the cerebral cortex, hippocampus, cerebellum, striatum and thalamus [21]; norepinephrine distribution in the thalamus [22]; the distribution of dopaminergic innervation [23]; expression of D2 receptors [24]; high affinity choline uptake [25]; the distribution of  $\epsilon 2$  NMDA receptor subunits on CA1 pyramidal neurons [26]; distribution of endogenous diacylglycerol [27]; deacylation and reacylation of complex lipids [28]; protein kinase C beta II levels in the amygdala [29]. Furthermore a proteomic analysis of adult hippocampus revealed that the expression of a variety of proteins was asymmetrically distributed between the left and right hippocampi [30].

In the human, left-right brain asymmetry appears to be present early in development but the early mechanisms inducing brain laterality still remain elusive [31]. Interestingly however, Sun and co-workers [32] have shown lateralized gene transcription in the embryonic human cortex. However, in rodents, in spite of the ample evidence supporting the anatomical and biochemical left-right asymmetry of the adult brain, its emergence during development has not been clearly documented. All the above mentioned studies have been performed in the adult brain and only a few during development: Some early studies had shown that in young male rats the right hippocampus was thicker than the left, as assessed by its cross sectional width, but that this asymmetry decreased with age, and was not significantly apparent at 90 days [33]. Another recent study using transcriptomic analysis showed that there was differential gene expression between the left and right hippocampus as early as postnatal day 6, at which time point more genes were overexpressed in the right compared to the left hippocampus; interestingly, there was a right to left shift of asymmetry in gene expression during development, so that on postnatal days 9 and 60 more genes were overexpressed in the left, compared to the right hippocampus [34]. Thus, the developmental emergence of left-right brain asymmetry in the rat still remains an open question.

The effects of early experiences on brain laterality were demonstrated as early as 1978 [35], when it was shown that neonatal handling results, in adulthood, in increased sensitivity to right, compared to left, neocortical ablation. In addition early studies showed that in rats neonatal handling leads to the development of cortical laterality in emotional regulation, with the right hemisphere being more involved [36]. More recent studies have shown that handling results in increased sensitivity of the dopaminergic system in the right infralimbic cortex. [37].

Furthermore, handling and maternal separation have opposite lateralized effects on the adult medial prefrontal cortex GABA neurotransmission, the former having more pronounced effects in the right while the latter in the left hemisphere [38]. Another set of studies in which rat pups were exposed to novelty showed that this early experience altered adult hippocampal volumetric asymmetry [39], induced a shift in paw preference in a reaching task [40] and in the preference of the direction of turning during exploration of an unfamiliar environment in adulthood [41,42,43]. Furthermore exposure of pups to novelty increases in adulthood synaptic plasticity (short- and long-term potentiation) preferentially in the right hippocampus [44]. Recently [45] maternal separation combined with early weaning (a mouse model of early neglect) has been shown to result in abnormal brain asymmetry, including that of the size of the hippocampus.

The present work is based on the hypothesis that, compared to control 13-day-old rat pups, pups exposed to either of the two early experience of our experimental model, RER and DER, would exhibit differences in protein expression in their left and right hippocampi, characteristic of the early experience. Furthermore, we hypothesized that at 13 days after birth the rat hippocampus shows left-right asymmetry in protein expression and that the early experiences could affect this laterality.

## Materials and Methods

### Ethics Statement

All animal experiments were carried out in agreement with ethical recommendation of the European Communities Council Directive of 22 September 2010 (2010/63/EU) and the experimental protocol was approved by the Ethics Committee of the Faculty of Nursing-University of Athens (# 43/9-1-09).

### Animals

Wistar rat pups born and reared in our colony were used in these experiments. Animals were kept under standard conditions (24°C, 12:12 h light/dark cycle) and mothers received food and water *ad libitum*. Prior to the day of birth, which was designated as postnatal day 0, each litter was randomly assigned to either of the two experimental groups [pups denied (DER) or receiving (RER) the expected reward], or to the control (CTR) (non-handled) group. In this study, fifteen litters were used, five per experimental group. The average litter size [mean  $\pm$  standard error of the mean (SEM): 10  $\pm$  1, range: 7–13] did not differ between the 3 groups. Litters were not culled, since it has been shown that litter size within this range does not affect maternal behavior [46]. The sex ratio (males/females) did not differ among the litters employed in the different animal groups [Average sex ratio (mean  $\pm$  SEM): Control litters 1.07  $\pm$  0.10, RER litters 1.05  $\pm$  0.11, DER litters 1.06  $\pm$  0.17]. In order to maintain stable environmental stimulation for the pups, instead of cleaning the cage, wood chip was added every 4–5 days, without disturbing either the pups or the dam.

### Neonatal Training in the T-maze

The neonatal experience model has been previously described in detail [5,6]. Pups of each litter, were trained under either Receipt of Expected Reward (RER rat pups) or Denial of Expected Reward (DER rat pups), starting from postnatal day 10 until postnatal day 13. We used a custom-made T-maze whose arms led to two cages with dimensions 30 cm width  $\times$  22 cm length  $\times$  30 cm height. The dimensions of the start box and the arms of the T-maze were 8 cm width  $\times$  6 cm length  $\times$  6 cm height and 7 cm width  $\times$  30 cm length  $\times$  6 cm height respectively. At the end of the one arm of the T-maze a small sliding door (9  $\times$  11 cm)

permitted access to the mother-containing cage when pups were trained under continuous reinforcement (RER) or remained always closed, preventing entrance into the cage, when pups were trained under the condition of denial of expected reward (DER). At the end of the other arm of the T-maze another cage was placed, without access from inside the T-maze, containing a virgin female rat for control purposes.

**Training under Receipt of Expected Reward (RER rat pups).** Rat pups trained under the “reward” schedule were exposed to 10 trials per day (a total of 40 trials for the 4 experimental days). At the end of the duration of the trial (60 sec), or when the pup located the entrance of the mother-containing cage the sliding-door opened and the mother could retrieve the pup. If a pup did not succeed to reach the entrance of the mother-containing cage before the end of the maximum duration of the trial, it was gently guided to the entrance, the sliding door opened and the mother was allowed to retrieve the pup. In either case, following the end of the trial, the pup returned to the mother-containing cage and then the next pup was exposed to the same procedure. When all pups were exposed to the first trial the same procedure was repeated for the next trial until 10 trials were performed.

**Training under Denial of Expected Reward (DER rat pups).** A similar training schedule was followed for the DER rats (10 trials per day for 4 training days, max duration 60 seconds each). The behavioral observation was terminated when the pup located the entrance of the mother-containing cage. If a pup did not succeed to reach the entrance of the mother-containing cage before the end of the 60 sec, it was gently guided to the entrance and had to remain there for 20 seconds. Immediately after the end of the trial the pup was returned to the start box of the T-maze for the next trial. Following the completion of 10 trials the pup was returned to the mother-containing cage and then another pup was exposed to the same procedure. At the end of the 10 daily trials for all littermates, the mother, followed by the litter, was returned to the home cage in the animal facility room.

### Tissue Preparation and 2-dimensional Electrophoresis (2-DE) Gels

On postnatal day 13, two hours after their exposure to the last training trial, pups were euthanized, decapitated, brains were removed and the left and right hippocampus were dissected. Dissected hippocampi were stored at  $-80^{\circ}\text{C}$  until further processing. For each experimental group (RER, CTR, DER) 2 samples were prepared, in each of which 5, either left or right, hippocampi were pooled. Tissue homogenization was performed as previously described [30,47]: Hippocampi were suspended in 350  $\mu\text{l}$  sample buffer containing 20 mM Tris, 7 M urea, 2 M thiourea, 4% CHAPS, 10 mM 1,4-dithioerythritol, 1 mM EDTA, and a mixture of protease inhibitors (1 mM PMSF and 1 tablet Complete<sup>TM</sup> (Roche Diagnostics, Basel, Swiss) per 50 ml of suspension buffer) and phosphatase inhibitors (0.2 mM  $\text{Na}_2\text{VO}_3$  and 1 mM NaF). The suspension was sonicated for  $\sim 30$  s and centrifuged at 150,000 g for 20 min. The protein content in the supernatant was determined using the Bradford method.

For the isoelectric focusing, 1 mg total protein was applied by the non-cup technique on 17 cm immobilized pH 3–10 nonlinear gradient IPG strips (Bio-Rad, Hercules, CA, USA) and electrophoresed for 90 kVh. For the second-dimension of electrophoresis 12% sodium dodecyl sulfate (SDS) polyacrylamide gels were run in a Proteiner apparatus (Bio-Rad) and the gels were stained with colloidal Coomassie Blue (Novex, San Diego, CA, USA). The six samples (right-left hippocampi  $\times 3$  experimental groups) were subjected to 2-D electrophoresis concomitantly, while the other

six (biological replicate) were run (together) at a different time, as a separate analysis.

### Gel Image Analysis

Coomassie stained gels were scanned on a GS-800 BioRad calibrated densitometer. The resulting TIFF images were analyzed using the PDQuest Software v. 8.0. Protein spots showing differences in their expression level were identified and mean spot volume was calculated. In the final tables only proteins showing at least a 2-fold (200%) difference in expression level were included.

### Matrix-Assisted Laser Desorption/Ionization Time-of-Flight Mass Spectrometry (MALDI-TOF-MS)

Peptide analysis and protein identification were performed as previously described [30,47]. The selected spots were manually detected on the gels by Melanie 4.02 software (GeneBio, Geneve Bioinformatics S.A., Geneva, Swiss). They were excised by the Proteiner SPII (Bruker Daltonics, Bremen, Germany), destained with 30% acetonitrile in 50 mM ammonium bicarbonate, dried in a speed vacuum concentrator (MaxiDry Plus; Heto, Allerød, Denmark) and rehydrated with 5  $\mu\text{l}$  of 1 mM ammonium bicarbonate containing 50 ng trypsin (Roche Diagnostics) and left in the dark overnight at room temperature. Twenty microlitre of 50% acetonitrile, containing 0.1% trifluoroacetic acid were added to each gel piece and incubated for 15 min with constant shaking. The resulting peptide mixture (1  $\mu\text{l}$ ) was simultaneously applied with 1  $\mu\text{l}$  of matrix solution, consisting of 0.8% *a*-cyano-4-hydroxycinnamic acid (Sigma-Aldrich), standard peptides des-Arg-bradykinin (904.4681 Da; Sigma-Aldrich), and adrenocorticotrophic hormone fragment 18–39, (2465.1989 Da; Sigma-Aldrich) in 50% acetonitrile and 0.1% trifluoroacetic acid. Samples were analyzed with matrix-assisted laser desorption-mass spectrometry (MALDI-MS) in a time-of-flight mass spectrometer (Ultraflex II, Bruker Daltonics, Bremen, Germany). Laser shots ( $n = 1,000$ ) at intensity between 40 and 60% were collected and summarized using the FlexControl v2.2 software by Bruker. Peak list was created with Flexanalysis v2.2 software. Smoothing was applied with the Savitzky-Golay algorithm (width 0.2 m/z, cycle number 1). S/N threshold ratio of 2.5 was allowed. SNAP algorithm was used for peak picking. Matching peptides and protein searches were performed automatically. Each spectrum was interpreted with the Mascot Software v. 2.0 (Matrix Sciences, London, UK) which is a software search engine that uses mass spectrometry data to identify proteins from primary sequence database. This software compares the mass spectrometry data obtained experimentally, to all sequences in a database and provides a list of hits with decreasing scores which represent the degree of the reliability of identification: The higher the score, the better the identification. In practice, positive identification of a protein is accepted if the mascot score obtained for this protein is higher than the set threshold [48,49]. In our study, the mascot score was set at  $>49$  ( $p < 0.05$ ), which corresponds to a probability of 95% that the protein identified is not a random match. For peptide identification, the monoisotopic masses were used and a mass tolerance of 0.0025% (25 ppm) was allowed. All extraneous peaks, such as trypsin autodigests, matrix, and keratin peaks, were not considered in the protein search. Cysteine carbamidomethylation and methionine oxidation were set as fixed and variable modifications, respectively. One miscleavage was allowed. The peptide masses were then compared with the theoretical peptide masses of all proteins from rodents using the SWISS-PROT and TrEMBL protein sequence databases.

## Western Blotting

For selected proteins differences in expression level detected by the proteomics analysis were confirmed by western blotting. For each group (RER, DER CTR) the left and right hippocampus of 3 different non-littermate 13-day-old pups was homogenized separately and subjected to western analysis, performed as previously described [7]. It should be noted that the 3 animals per group used for Western blotting were different from the ones used in the proteomic analysis. Each hippocampus, right or left, was homogenized in 120  $\mu$ l of an ice cold lysis buffer (20 mM Tris HCl pH 7.6, 137 mM NaCl, 48 mM NaF, 2 mM  $\text{Na}_3\text{VO}_4$ , 1% SDS, and 10% glycerol, 1:250 Protease Inhibitor Cocktail Sigma). The homogenates were centrifuged at 14,000 rpm for 20 min at 4°C. Hippocampal protein lysates were resolved on 4–12% NuPAGE® Bis-Tris precast polyacrylamide gels (Invitrogen, USA), and blotted to 0.45  $\mu$ m nitrocellulose membranes (Whatman, Schleicher and Schuel; Dassel, Germany). In order to prevent non-specific staining membranes were blocked for 2 h at room temperature with 5% nonfat dry milk in TBS containing 0.05% Tween-20. The membranes were then incubated overnight with primary antibodies and afterwards with the appropriate secondary HRP-conjugated antibodies (from Santa Cruz and Millipore) in TBST. The primary antibodies used were anti-glyceraldehydes-3-phosphate dehydrogenase (GAPDH) mouse monoclonal antibody 1:1000 (MAB374 Millipore, Billenica, MA, USA), anti-GFAP 1:1000 (Z334, DakoCytomation), anti-heat-shock protein 70 (HSP70) 1:1000 (sc-1060, Santa Cruz Biotechnology Inc., CA, USA), anti-dihydropyrimidinase like protein 1 (DRP1) 1:2000 (Ab36191, Abcam), anti-tubulin beta 1:2000 (T4026, Sigma-Aldrich, St. Louis, MO, USA), anti- $\beta$ -actin 1:1000 (sc-47778, Santa Cruz Biotechnology Inc., CA, USA). The signal was visualized on autoradiographic films (Kodak XAR) by chemiluminescence (Amersham, UK). Quantification of the amount of each protein was performed using the Image J Software. The optical density of each band was divided by the optical density of the respective GAPDH band, since GAPDH expression did not show any differences between groups or right and left hippocampi, in our proteomic analysis.

## Statistical Analysis

Data from Western blots were analyzed by one-way repeated measures ANOVA with the side of the brain as the repeated measure and the experimental group (control, RER, DER) as the independent factor.

## Results

The PD-Quest 2D analysis software demonstrated that using a broad range pH 3–10 IPG strip for the first dimension, resulted in the appearance of a large number of spots in each gel. See Figure 1 for representative gels of the proteins in the right and left hippocampus of 13-day-old CTR, RER, and DER rat pups. We identified and spot-picked a total of 414 spots which were differentially expressed either between experimental groups, or right and left hippocampi. These spots were then gel-excised and trypsin-digested and the trypsin digests were analyzed by mass spectrometry. We, thus, identified 96 different proteins. Tables 1, 2, 3, 4, 5, 6, 7, 8, 9, 10, 11, 12, 13, 14, 15, 16, 17, 18 show the differences in protein levels in either the left or the right hippocampus between the three experimental groups, or between the left and right hippocampus within each experimental group. Only proteins which showed at least a 2-fold difference in both replicates of any of the above mentioned comparisons were included in the tables.

## Group Differences

Tables 1, 2, 3, 4, 5, 6 present the proteins which have a different expression profile among the three groups (CTR, RER, DER) in the left hippocampus and Tables 7, 8, 9, 10, 11, 12 show the hippocampal proteins whose expression differs among the three groups in the right hippocampus.

Generally, the number of proteins whose expression was up-regulated (in- comparison to the CTR group) as a result of the early experience was greater in the RER animals than in the DER. In both the left and right hippocampus, in comparison to the CTR group, the RER animals had more up-regulated proteins than did the DER. More specifically, in the left hippocampus the RER animals had 17 up-regulated proteins while the DER only 5. Similarly, in the right hippocampus the RER animals had 16 up-regulated proteins, in comparison to the CTR, while the DER had only 4 such proteins. Interestingly, in the left hippocampus, the RER experience resulted not only in increased up-regulation, but also in increased down-regulation of protein expression: In the left hippocampus when compared to the CTR, the RER animals had a greater number of down-regulated proteins (7) than did the DER (3). In contrast, in the right hippocampus the DER - compared to the CTR-had a higher number of down-regulated proteins (25) than did the RER (9).

The comparison between the RER and DER groups of animals revealed that the two early experiences did not differ between them as to the number of proteins whose expression was altered (up- or down-regulated) in the left hippocampus. Of course there were qualitative differences, since the expression of different proteins was affected in the RER and the DER. In contrast, in the right hippocampus, only one protein, heat shock cognate protein 71, was up-regulated while 27 proteins were down-regulated in the DER compared to the RER.

## Laterality

Interestingly, proteomic analysis showed that more proteins had higher levels in the left than the right hippocampus of the 13-day-old CTR rat pups, while for fewer proteins the opposite held true. Table 13 shows the proteins that were found to have higher levels in the left hippocampus compared to the right, while Table 14 shows the proteins whose levels were higher in the right hippocampus compared to the left. More specifically, there were 25 proteins (5 of them were tubulins, 20 non-tubulins) that had higher levels in the left side, while only 7 proteins (all of them were non-tubulins) were found to have higher levels in the right hippocampus. Moreover, it was quite interesting that the group of animals which were Denied the Expected Reward (DER rat pups) followed the same pattern of left-right hippocampal asymmetry regarding protein up-regulation as the CTR group. Thus, it was found that in the left hippocampus of the DER rat pups there were 24 proteins (10 belonged to the tubulin family of proteins, 14 were non-tubulins) with higher levels in the left than the right, while only 7 proteins (all of them were non-tubulins) had higher levels in the right than the left hippocampus. The proteins whose levels were higher in the left or right hippocampus of the DER rat pups are shown in tables 15 and 16 respectively. Left-right asymmetry in the RER group appeared to be less pronounced than in the control or DER group. More specifically, only 18 proteins (5 of them were tubulins, and 13 were non-tubulins) were found to have higher levels in the left than the right hippocampus, while 10 (all of them being non-tubulin proteins) were up-regulated in the right compared to the left hippocampus. Table 17 presents the proteins whose levels were higher in the left hippocampus compared to the right, and Table 18 the proteins whose levels were higher in the right hippocampus compared to the left of the RER rat pups. In all

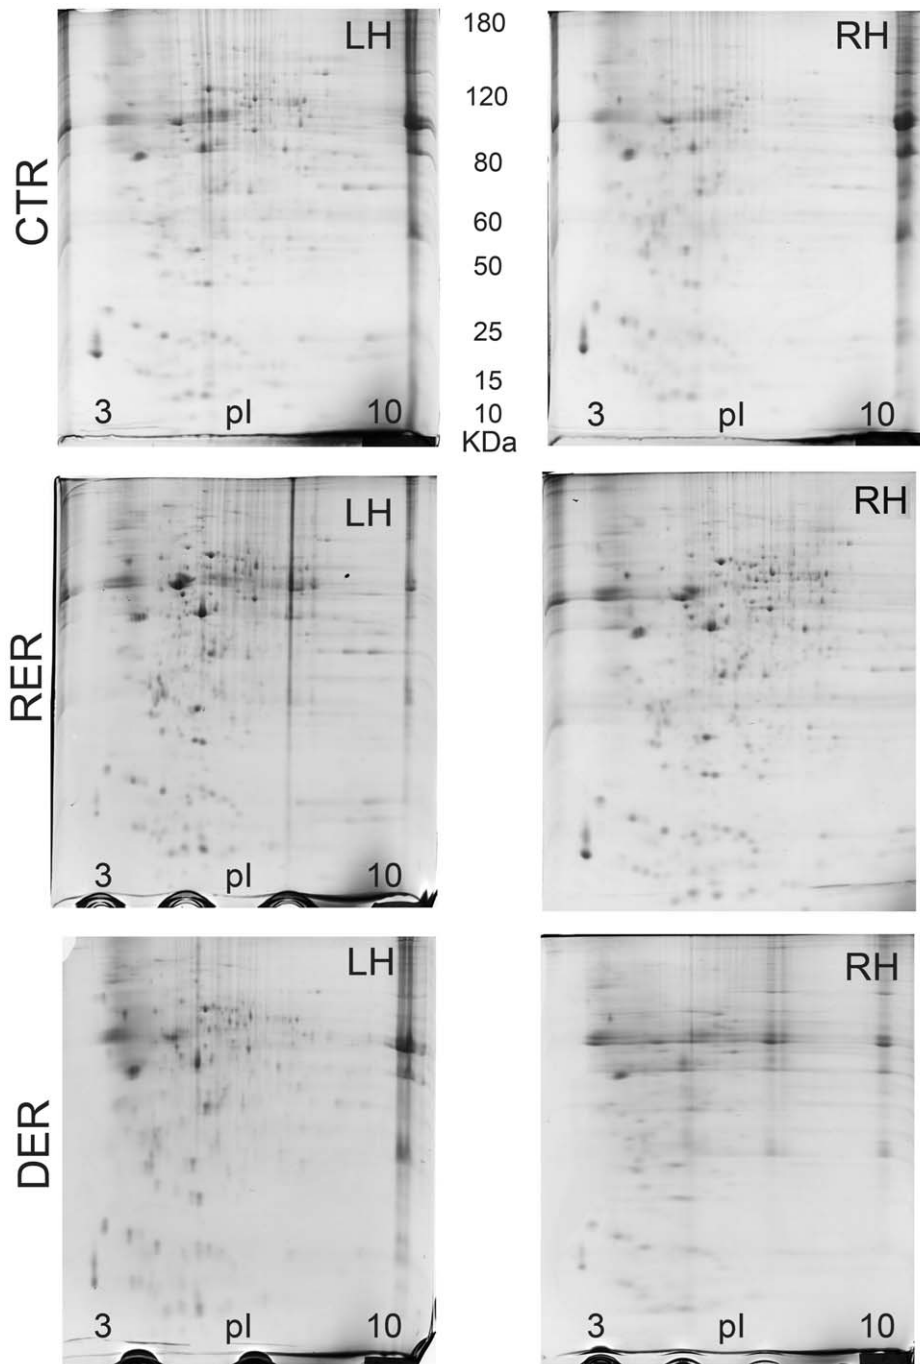

**Figure 1. Representative 2-DE gels of 13-day-old CTR, RER, DER pup left (LH) and right (RH) hippocampus.** Proteins were initially separated by isoelectric focusing in a non-linear 3–10 pH range and then according to their molecular weight on 12% SDS- polyacrylamide gels. 2-DE gels were stained with Coomassie Blue.  
doi:10.1371/journal.pone.0048337.g001

three experimental groups (CTR, RER, DER) tubulin had higher levels in the left than the right hippocampus.

#### Confirmation of the Group Differences and Laterality Results by Western Blotting

Immunoblotting was used to confirm some of the protein expression differences detected through the differential proteomics approach. Protein lysates from left and right hippocampus from individual animals were resolved by gel electrophoresis and blotted

with the appropriate antibody (as described in the Materials and Methods Section). Figure 2 shows representative western blot analyses of some of the proteins found by the proteomic analysis to differ either between experimental groups or between left and right hippocampi. These were  $\beta$ -tubulin,  $\beta$ -actin, glial fibrillary acidic protein (GFAP), dihydropyrimidinase like protein 1 (DRP1), heat-shock protein 70 (HSP70). The bars correspond to the relative quantification of the proteins, using GAPDH as the gel loading control.

**Table 1.** Proteins (5) with higher levels in the Left Hippocampus (LH) of the DER compared to those of the CTR.

| Accession number | Protein ID from Swiss Prot | Protein name                             | Mascot Score | Levels in DER<br>Levels in CTR |
|------------------|----------------------------|------------------------------------------|--------------|--------------------------------|
| P10719           | ATPB_RAT                   | ATP synthase subunit beta, mitochondrial | 202          | 12                             |
| P10860           | DHE3_RAT                   | Glutamate dehydrogenase 1, mitochondrial | 115          | 892                            |
| P04764           | ENOA_RAT                   | Alpha-enolase                            | 197          | 6492                           |
| P07323           | ENOG_RAT                   | Gamma-enolase                            | 217          | 1520                           |
| O88767           | PARK7_RAT                  | Protein DJ-1                             | 62           | 18                             |

doi:10.1371/journal.pone.0048337.t001

Statistical analysis using one way repeated measures ANOVA with the side of the brain as the repeated measure and the group of animals (CTR, RER, DER) as the independent factor for  $\beta$ -tubulin levels revealed a statistically significant side  $\times$  group interaction ( $F_{1,6} = 7.896$ ,  $p = 0.021$ ). Post hoc analysis indicated that in the DER group higher levels of  $\beta$ -tubulin were found in the left than in the right hippocampus ( $\dagger p = 0.041$ ). Moreover, in the right hippocampus control animals had lower levels of  $\beta$ -tubulin compared to either the RER or the DER animals (post hoc,  $*p = 0.006$  CTR vs. RER,  $\# p = 0.025$  CTR vs. DER), while in the left hippocampus both the control and the RER animals had lower levels than the DER (post hoc,  $\# p = 0.004$  CTR vs. DER,  $\S p = 0.004$  RER vs. DER).

Similar analysis showed for  $\beta$ -actin protein levels a statistically significant side  $\times$  group interaction ( $F_{1,6} = 23.471$ ,  $p = 0.001$ ). Further analysis indicated that in both the control and the DER group  $\beta$ -actin levels were higher in the left than in the right hippocampus ( $\dagger p < 0.05$  for both groups) while no laterality was observed in the RER group. In addition, in the right hippocampus RER animals had higher levels of  $\beta$ -actin compared to both the CTR and the DER (post hoc,  $*p = 0.008$  CTR vs. RER,  $\S p = 0.017$  RER vs. DER).

One way ANOVA with repeated measures for GFAP protein levels revealed a statistically significant group effect ( $F_{2,6} = 21.848$ ,  $p = 0.002$ ) with the RER group having higher levels of GFAP in both sides of the hippocampus, compared to both the CTR and the DER groups (post hoc,  $*p = 0.002$  CTR vs. RER,  $\S p = 0.001$  RER vs. DER).

Similar analysis for DRP1 protein levels showed a statistically significant side  $\times$  group interaction ( $F_{1,6} = 74.546$ ,  $p < 0.001$ ). Further post-hoc analysis indicated that in both the control and the RER group DRP1 levels were higher in the right than in the left hippocampus ( $\dagger p < 0.05$  for both groups) while no laterality was observed in the DER group. In addition, in the right hemisphere DRP1 levels differed between the 3 groups with the highest levels found in the CTR and the lowest in the DER group (post-hoc,  $*p = 0.011$  CTR vs. RER,  $\# p = 0.001$  CTR vs. DER, and  $\S p = 0.049$  RER vs. DER).

The same statistical analysis for HSP70 protein levels revealed a statistically significant side  $\times$  group interaction ( $F_{1,6} = 23.308$ ,  $p = 0.001$ ). Post-hoc analysis verified in the DER group a significant lateralized expression of HSP70, with higher levels in the right compared to the left hippocampus ( $\dagger p = 0.011$ ). Moreover, in both right and left hippocampi, HSP70 levels were higher in the RER group compared to both the CTR and DER (for the right hemisphere, post hoc,  $*p < 0.001$  CTR vs. RER,  $\S p = 0.017$  RER vs. DER; for the left hemisphere,  $*p = 0.033$  CTR vs. RER,  $\S p < 0.001$  RER vs. DER). Also, HSP70 levels differed between control and DER animals in both sides of the hippocampus: In the right side DER animals had higher levels ( $\# p = 0.011$ ) while in the left side the opposite was true ( $\# p = 0.001$ ).

The majority of differences revealed by the proteomic analysis were confirmed by the western blotting. Lack of complete agreement between the results of the proteomic analysis and those of the western blotting could be partially due to the fact that the linearity in the dynamic range of the Coomassie-Blue assay is restricted. Furthermore similar inconsistencies have also been reported by others [8,30].

## Discussion

The results of the present work clearly demonstrate that the rat hippocampus is lateralized with regard to protein expression levels, as early as 13 days of age and that this laterality can be influenced by early experiences.

The proteins whose expression level was found to differ either between the three experimental groups (DER, RER, CTR) or between the left and right hemisphere belong primarily to three functional classes: cytoskeletal (34%), proteins involved in intermediary, energy metabolism (32%), and in detoxification including chaperones and heat shock proteins (17%), while other categories such as proteins involved in signal transduction (5%), vesicle trafficking (5%) or protein synthesis or degradation (4%), are represented in smaller percentages of the total. Notably similar categories of proteins have been found to differ in their expression

**Table 2.** Proteins (3) with higher levels in the Left Hippocampus (LH) of the CTR compared to those of the DER.

| Accession number | Protein ID from Swiss Prot | Protein name                        | Masco Score | Levels in CTR<br>Levels in DER |
|------------------|----------------------------|-------------------------------------|-------------|--------------------------------|
| Q62951           | DPYL4_RAT                  | Dihydropyrimidinase-related protein | 177         | 4                              |
| P16086           | SPTA2_RAT                  | Spectrin alpha chain, brain         | 232         | 15                             |
| Q6P9T8           | TBB2C_RAT                  | Tubulin beta-2C chain               | 57          | 15                             |

doi:10.1371/journal.pone.0048337.t002

**Table 3.** Proteins (17) with higher levels in the Left Hippocampus (LH) of the RER compared to those of the CTR.

| Accession number | Protein ID from Swiss Prot | Protein name                                     | Mascot Score | Levels in RER<br>Levels in CTR |
|------------------|----------------------------|--------------------------------------------------|--------------|--------------------------------|
| Q9ER34           | ACON_RAT                   | Aconitate hydratase, mitochondrial               | 79           | 383                            |
| P23565           | AINX_RAT                   | Alpha-internexin                                 | 56           | 8                              |
| P02770           | ALBU_RAT                   | Serum albumin                                    | 157          | 616                            |
| P07323           | ENOG_RAT                   | Gamma-enolase                                    | 204          | 9                              |
| Q66HD0           | ENPL_RAT                   | Endoplasmin                                      | 119          | 68                             |
| P85845           | FSCN1_RAT                  | Fascin                                           | 94           | 6                              |
| Q5XI73           | GDIR1_RAT                  | Rho GDP-dissociation inhibitor 1                 | 99           | 816                            |
| P48721           | GRP75_RAT                  | Stress-70 protein, mitochondrial                 | 111          | 1994                           |
| P06761           | GRP78_RAT                  | 78 kDa glucose-regulated protein                 | 242          | 7                              |
| P34058           | HS90B_RAT                  | Heat shock protein HSP 90-beta                   | 146          | 820                            |
| O88600           | HSP74_RAT                  | Heat shock 70 kDa protein 4                      | 235          | 23                             |
| P19527           | NFL_RAT                    | Neurofilament light polypeptide                  | 174          | 8                              |
| O88767           | PARK7_RAT                  | Protein DJ-1                                     | 54           | 15                             |
| P31044           | PEBP1_RAT                  | Phosphatidylethanolamine-binding protein 1       | 110          | 5                              |
| P25113           | PGAM1_RAT                  | Phosphoglycerate mutase 1                        | 160          | 3                              |
| P46462           | TERA_RAT                   | Transitional endoplasmic reticulum ATPase        | 252          | 3                              |
| Q00981           | UCHL1_RAT                  | Ubiquitin carboxyl-terminal hydrolase isozyme L1 | 142          | 11249                          |

doi:10.1371/journal.pone.0048337.t003

level following maternal separation [8,9], chronic stress [50,51,52] and in the schizophrenic human brain [53,54]. It should be noted that in our study, as in other similar ones using proteomic analysis based on 2-D gels [30,55], there is a bias towards abundant, soluble proteins, with intermediate molecular weights. Thus, possible differences in proteins of low abundance, or with low or high molecular weight could have been missed, due to the limitations of the analytical method.

Among cytoskeletal proteins, tubulins represent the single protein family whose expression was found to differ most often between the two hemispheres and the experimental groups (17%). Tubulins are the building blocks of microtubules, a major component of the cytoskeleton, which is the cellular structure supporting neuronal axons and dendrites and astrocytic process. It is well known that microtubules undergo growth and reorganization during development and as part of the cellular processes underlying neuronal plasticity. Furthermore, microtubules are the structural components of cilia, which are known to play a role in

visceral organ asymmetry, but not in establishing brain laterality at least in humans [31], while in the zebrafish both brain and body asymmetry are affected by altered cilia function [56]. Most interestingly, tubulins were found to have higher levels in the left than the right hemisphere, in all experimental groups, indicating that at this developmental stage there were more growth- and plasticity-related processes going on in the left hemisphere. Relevant to this point is also the finding that tubulins had higher levels in the left hippocampus of the DER animals, compared to that of the RER. Previous studies from our laboratory have indicated that the DER early experience could have analogies to the human situation where the mother is present but unavailable to the child [10]. It is thus interesting to note that tubulin expression has been reported to change in the rat hippocampus following isolation rearing [57], and other stressful experiences, such as chronic unpredictable mild stress [52] or restraint stress [58]. Moreover, changes in the levels of the tubulins have been revealed by proteomic analysis in the hippocampus and cortex,

**Table 4.** Proteins (7) with higher levels in the Left Hippocampus (LH) of the CTR compared to those of the RER.

| Accession number | Protein ID from Swiss Prot | Protein name                                                                             | Mascot Score | Levels in CTR<br>Levels in RER |
|------------------|----------------------------|------------------------------------------------------------------------------------------|--------------|--------------------------------|
| P60711           | ACTB_RAT                   | Actin, cytoplasmic 1                                                                     | 116          | 7                              |
| P63259           | ACTG_RAT                   | Actin, cytoplasmic 2                                                                     | 108          | 9                              |
| P10719           | ATPB_RAT                   | ATP synthase subunit beta, mitochondrial                                                 | 149          | 3                              |
| P47942           | DPYL2_RAT                  | Dihydropyrimidinase-related protein 2                                                    | 64           | 8                              |
| P47819           | GFAP_RAT                   | Glial fibrillary acidic protein                                                          | 243          | 7                              |
| P63018           | HSP7C_RAT                  | Heat shock cognate 71 kDa protein                                                        | 194          | 25620                          |
| P08461           | ODP2_RAT                   | Dihydrolypopylsine-residue acetyltransferase component of pyruvate dehydrogenase complex | 64           | 4                              |

doi:10.1371/journal.pone.0048337.t004

**Table 5.** Proteins (15) with higher levels in the Left Hippocampus (LH) of the DER compared to those of the RER.

| Accession number | Protein ID from Swiss Prot | Protein name                          | Mascot Score | Levels in DER<br>Levels in RER |
|------------------|----------------------------|---------------------------------------|--------------|--------------------------------|
| P23565           | AINX_RAT                   | Alpha-internexin                      | 220          | 5                              |
| P47942           | DPYL2_RAT                  | Dihydropyrimidinase-related protein 2 | 171          | 3                              |
| Q62952           | DPYL3_RAT                  | Dihydropyrimidinase-related protein 3 | 89           | 3                              |
| P04764           | ENOA_RAT                   | Alpha-enolase                         | 197          | 14                             |
| P63018           | HSP7C_RAT                  | Heat shock cognate 71 kDa protein     | 226          | 14611                          |
| P11598           | PDIA3_RAT                  | Protein disulfide-isomerase A3        | 112          | 4                              |
| Q6P9V9           | TBA1B_RAT                  | Tubulin alpha-1B chain                | 144          | 87                             |
| Q6AYZ1           | TBA1C_RAT                  | Tubulin alpha-1C chain                | 112          | 14                             |
| Q68FR8           | TBA3_RAT                   | Tubulin alpha-3 chain                 | 121          | 87                             |
| Q5XIF6           | TBA4A_RAT                  | Tubulin alpha-4A chain                | 121          | 87                             |
| P85108           | TBB2A_RAT                  | Tubulin beta-2A chain                 | 180          | 13                             |
| Q3KRE8           | TBB2B_RAT                  | Tubulin beta-2B chain                 | 214          | 10                             |
| Q6P9T8           | TBB2C_RAT                  | Tubulin beta-2C chain                 | 163          | 10                             |
| Q4QRB4           | TBB3_RAT                   | Tubulin beta-3 chain                  | 141          | 13                             |
| P69897           | TBB5_RAT                   | Tubulin beta-5 chain                  | 229          | 10                             |

doi:10.1371/journal.pone.0048337.t005

following maternal separation in rats [8], as well as in postmortem tissues from patients with psychiatric diseases [53,59], indicating the importance of microtubular dynamics in stress-induced pathology and the aetiopathogenesis of psychiatric disorders.

Another cytoskeletal protein whose levels were also found to be higher in the left, compared to the right hippocampus (of the CTR and DER animals), was  $\beta$ -actin, the building block of microfilaments, the supporting structure of dendritic spines, which are reorganized during plasticity-related processes, further supporting that such processes are occurring more in the left hippocampus. Notably actin expression has been shown to change in the rat hippocampus, following maternal separation [8]. Other cytoskel-

etal proteins functionally involved in neuronal growth, development, regeneration and plasticity were also found to have higher levels in the left compared to the right hippocampus, albeit not in all groups. One of them is  $\alpha$ -internexin, an intermediate filament component found in the post-synaptic density, whose levels were higher in the left compared to the right hippocampus of the CTR and RER animals. This finding also supports the view (expressed above) that there are more growth and developmental processes, including new synapse formation, occurring in the left hippocampus, since it has been proposed that synaptogenesis is accompanied by intermediate filament remodeling [60]. Other protein belonging to same class are neurofilament light and medium chains,

**Table 6.** Proteins (14) with higher levels in the Left Hippocampus (LH) of the RER compared to those of the DER.

| Accession number | Protein ID from Swiss Prot | Protein name                                                                              | Mascot Score | Levels in RER<br>Levels in DER |
|------------------|----------------------------|-------------------------------------------------------------------------------------------|--------------|--------------------------------|
| P63102           | 1433Z_RAT                  | 14-3-3 protein zeta/delta                                                                 | 124          | 3370                           |
| P02770           | ALBU_RAT                   | Serum albumin                                                                             | 157          | 4                              |
| Q3T1K5           | CAZA2_RAT                  | F-actin-capping protein subunit alpha-2                                                   | 72           | 1522                           |
| B0BNA5           | COTL1_RAT                  | Coactosin-like protein                                                                    | 71           | 34                             |
| Q62951           | DPYL4_RAT                  | Dihydropyrimidinase-related protein 4                                                     | 177          | 11                             |
| P50398           | GDIA_RAT                   | Rab GDP dissociation inhibitor alpha                                                      | 199          | 7510                           |
| P47819           | GFAP_RAT                   | Glial fibrillary acidic protein                                                           | 237          | 2084                           |
| O88600           | HSP74_RAT                  | Heat shock 70 kDa protein 4                                                               | 235          | 6                              |
| Q6P7Q4           | LGUL_RAT                   | Lactoylglutathione lyase                                                                  | 104          | 10                             |
| P08461           | ODP2_RAT                   | Dihydrolypoyllysine-residue acetyltransferase component of pyruvate dehydrogenase complex | 64           | 7                              |
| P38983           | RSSA_RAT                   | 40S ribosomal protein SA                                                                  | 118          | 3                              |
| Q6AY84           | SCRN1_RAT                  | Secernin-1                                                                                | 121          | 77                             |
| P16086           | SPTA2_RAT                  | Spectrin alpha chain, brain                                                               | 56           | 4                              |
| P46462           | TERA_RAT                   | Transitional endoplasmic reticulum ATPase                                                 | 252          | 3                              |

doi:10.1371/journal.pone.0048337.t006



**Table 7.** Proteins (4) with higher levels in the Right Hippocampus (RH) of the DER compared to those of the CTR.

| Accession number | Protein ID from Swiss Prot | Protein name                              | Mascot Score | Levels in DER<br>Levels in CTR |
|------------------|----------------------------|-------------------------------------------|--------------|--------------------------------|
| P04764           | ENOA_RAT                   | Alpha-enolase                             | 107          | 3                              |
| P63018           | HSP7C_RAT                  | Heat shock cognate 71 kDa protein         | 83           | 8                              |
| P46462           | TERA_RAT                   | Transitional endoplasmic reticulum ATPase | 269          | 211                            |
| P85972           | VINC_RAT                   | Vinculin                                  | 103          | 1088                           |

doi:10.1371/journal.pone.0048337.t007

whose expression also showed a left-right asymmetry in the animals exposed to the early experience (RER and DER). In addition, neurofilament light chain, as well as F-actin capping protein, which regulate actin polymerization and/or depolymerization, also differed between the two experimental groups, showing higher levels in the RER compared to the DER. An additional cytoskeletal protein, worth mentioning is Glial Fibrillary Acidic Protein (GFAP), which was found to be up-regulated in the hippocampus of the RER rat pups. Astrocytic intermediate filaments are composed of GFAP, which is thus a marker of astrocytes [61]. Since astrocytes develop later, our present finding could suggest that the RER early experience might accelerate hippocampal development.

Dihydropyrimidinase like protein (DRP) 1, 2, 3, 4 and 5 comprise another group of proteins, whose expression levels were lateralized, and/or was affected by the early experiences of our model. More specifically DRP 1, 4, and 5 levels were higher in the right compared to the left hippocampus of the RER and CTR rat pups; DRP 3 showed the opposite asymmetrical expression (higher in left than right) in the DER group, while DRP 2 expression was not lateralized. Furthermore, differences in protein levels were detected among the experimental groups (DER, RER, CTR): The levels of all 5 DRPs were lower in the right hippocampus of the DER pups, while in their left hippocampus, DRP 2 and 3 levels were higher than the respective of the RER. DRPs play a role in neurogenesis, neuron differentiation and migration, axon exten-

**Table 8.** Proteins (25) with higher levels in the Right Hippocampus (RH) of the CTR compared to those of the DER.

| Accession number | Protein ID from Swiss Prot | Protein name                                     | Mascot Score | Levels in CTR<br>Levels in DER |
|------------------|----------------------------|--------------------------------------------------|--------------|--------------------------------|
| P63039           | CH60_RAT                   | 60 kDa heat shock protein, mitochondrial         | 157          | 1417                           |
| P51635           | AK1A1_RAT                  | Alcohol dehydrogenase [NADP+]                    | 96           | 238                            |
| P10719           | ATPB_RAT                   | ATP synthase subunit beta, mitochondrial         | 173          | 2                              |
| P31399           | ATP5H_RAT                  | ATP synthase subunit d, mitochondrial            | 110          | 3                              |
| Q6P6R2           | DLDH_RAT                   | Dihydropoloyl dehydrogenase, mitochondrial       | 92           | 355                            |
| Q62950           | DPYL1_RAT                  | Dihydropyrimidinase-related protein 1            | 141          | 4                              |
| P47942           | DPYL2_RAT                  | Dihydropyrimidinase-related protein 2            | 133          | 538                            |
| Q66HD0           | ENPL_RAT                   | Endoplasmin                                      | 105          | 5                              |
| P09117           | ALDOC_RAT                  | Fructose-bisphosphate aldolase C                 | 197          | 2                              |
| P07323           | ENOG_RAT                   | Gamma-enolase                                    | 209          | 4                              |
| P62994           | GRB2_RAT                   | Growth factor receptor-bound protein 2           | 91           | 5                              |
| P42123           | LDHB_RAT                   | L-lactate dehydrogenase B chain                  | 100          | 1945                           |
| O35244           | PRDX6_RAT                  | Peroxiredoxin-6                                  | 180          | 5                              |
| P31044           | PEBP1_RAT                  | Phosphatidylethanolamine-binding protein 1       | 123          | 2                              |
| P25113           | PGAM1_RAT                  | Phosphoglycerate mutase 1                        | 136          | 1179                           |
| P48721           | GRP75_RAT                  | Stress-70 protein, mitochondrial                 | 233          | 3                              |
| Q5XIM9           | TCPB_RAT                   | T-complex protein 1 subunit beta                 | 83           | 850                            |
| P48500           | TPIS_RAT                   | Triosephosphate isomerase                        | 167          | 155                            |
| P68370           | TBA1A_RAT                  | Tubulin alpha-1A chain                           | 177          | 4                              |
| Q6P9V9           | TBA1B_RAT                  | Tubulin alpha-1B chain                           | 177          | 4                              |
| Q6AYZ1           | TBA1C_RAT                  | Tubulin alpha-1C chain                           | 142          | 4                              |
| Q68FR8           | TBA3_RAT                   | Tubulin alpha-3 chain                            | 132          | 4                              |
| Q5XIF6           | TBA4A_RAT                  | Tubulin alpha-4A chain                           | 145          | 4                              |
| Q00981           | UCHL1_RAT                  | Ubiquitin carboxyl-terminal hydrolase isozyme L1 | 107          | 4                              |
| Q4KM73           | KCY_RAT                    | UMP-CMP kinase                                   | 146          | 9                              |

doi:10.1371/journal.pone.0048337.t008

**Table 9.** Proteins (16) with higher levels in the Right Hippocampus (RH) of the RER compared to those of the CTR.

| Accession number | Protein ID from Swiss Prot | Protein name                                                                              | Mascot Score | Levels in RER<br>Levels in CTR |
|------------------|----------------------------|-------------------------------------------------------------------------------------------|--------------|--------------------------------|
| P60711           | ACTB_RAT                   | Actin, cytoplasmic 1                                                                      | 89           | 22                             |
| P63259           | ACTG_RAT                   | Actin, cytoplasmic 2                                                                      | 89           | 22                             |
| P38062           | AMPM2_RAT                  | Methionine aminopeptidase 2                                                               | 105          | 2                              |
| P18418           | CALR_RAT                   | Calreticulin                                                                              | 235          | 6                              |
| Q62952           | DPYL3_RAT                  | Dihydropyrimidinase-related protein 3                                                     | 175          | 3                              |
| P04764           | ENOA_RAT                   | Alpha-enolase                                                                             | 107          | 2                              |
| P54311           | GBB1_RAT                   | Guanine nucleotide-binding protein G(l)/G(S)/G(T) subunit beta-1                          | 127          | 2396                           |
| P54313           | GBB2_RAT                   | Guanine nucleotide-binding protein G(l)/G(S)/G(T) subunit beta-2                          | 70           | 2396                           |
| P47819           | GFAP_RAT                   | Glial fibrillary acidic protein                                                           | 358          | 3                              |
| Q66HF1           | NDUS1_RAT                  | NADH-ubiquinone oxidoreductase 75 kDa subunit, mitochondrial                              | 163          | 2                              |
| P19527           | NFL_RAT                    | Neurofilament light polypeptide                                                           | 126          | 626                            |
| O35987           | NSF1C_RAT                  | NSFL1 cofactor p47                                                                        | 54           | 22                             |
| P08461           | ODP2_RAT                   | Dihydrolypoyllysine-residue acetyltransferase component of pyruvate dehydrogenase complex | 118          | 2                              |
| P11598           | PDIA3_RAT                  | Protein disulfide-isomerase A3                                                            | 195          | 3                              |
| P46462           | TERA_RAT                   | Transitional endoplasmic reticulum ATPase                                                 | 269          | 778                            |
| P85972           | VINC_RAT                   | Vinculin                                                                                  | 139          | 3                              |

doi:10.1371/journal.pone.0048337.t009

sion and guidance, as well as neuronal morphogenesis. These critical for neuronal development roles might be related to the fact that the levels of these proteins are found to be affected by maternal separation [8,9], repeated psychological stress [51], anxiety [62], as well as in both the cortex and hippocampus from patients suffering from bipolar or major depression, respectively [53,59].

Interestingly, in most proteomic analysis studies, such as those investigating the effects of maternal separation [8,9], chronic stress [51], or mood disorders [59,63] proteins which play a role in intermediary and energy metabolism appear to be up-, or down-regulated. In our study, in agreement with the above, these include ATP synthase subunits, creatine kinase, dihydrolypoyl dehydrogenase (part of the pyruvate dehydrogenase complex), among others. It appears that the high energy demands of the brain render it very sensitive to experimental manipulations or pathological processes, resulting in changes in the expression of enzymes involved in

energy production. Among such enzymes it is worth pointing out glutamate dehydrogenase, which also plays a role in the metabolism of the major excitatory neurotransmitter, glutamate. We found that its levels were higher in the left hippocampus of the DER, compared to those of the CTR, while in the right hippocampus the RER had lower levels than the DER.

In agreement with Marais et al. [9] and Carboni et al. [48] we found differences in the levels of heat shock proteins (HSPs) between the experimental groups. In addition HSPs were found to show left-right asymmetry in their expression. HSPs act as chaperones, either targeting proteins to their cellular destination, or removing abnormal, misfolded or partially degraded proteins. Among the HSPs, Hsp71 cognate protein was found to have higher levels in the left, compared to the right hippocampus, in all experimental groups, indicating more active protein trafficking as part of developmental processes in the left hippocampus, in agreement with our results on tubulins and  $\alpha$ -internexin (see

**Table 10.** Proteins (9) with higher levels in the Right Hippocampus (RH) of the CTR compared to those of the RER.

| Accession number | Protein ID from Swiss Prot | Protein name                                                | Mascot Score | Levels in CTR<br>Levels in RER |
|------------------|----------------------------|-------------------------------------------------------------|--------------|--------------------------------|
| Q6P6R2           | DLDH_RAT                   | Dihydrolypoyl dehydrogenase, mitochondrial                  | 92           | 488                            |
| P48721           | GRP75_RAT                  | Stress-70 protein, mitochondrial                            | 233          | 968                            |
| Q99NA5           | IDH3A_RAT                  | Isocitrate dehydrogenase [NAD] subunit alpha, mitochondrial | 167          | 2                              |
| Q05982           | NDKA_RAT                   | Nucleoside diphosphate kinase A                             | 97           | 2                              |
| P07632           | SODC_RAT                   | Superoxide dismutase [Cu-Zn]                                | 76           | 1406                           |
| P85108           | TBB2A_RAT                  | Tubulin beta-2A chain                                       | 197          | 8                              |
| Q6P9T8           | TBB2C_RAT                  | Tubulin beta-2C chain                                       | 150          | 8                              |
| Q4QRB4           | TBB3_RAT                   | Tubulin beta-3 chain                                        | 121          | 8                              |
| P69897           | TBB5_RAT                   | Tubulin beta-5 chain                                        | 197          | 8                              |

doi:10.1371/journal.pone.0048337.t010

**Table 11.** Protein (1) with higher levels in the Right Hippocampus (RH) of the DER compared to those of the RER.

| Accession number | Protein ID from Swiss Prot | Protein name                      | Mascot Score | Levels in DER<br>Levels in RER |
|------------------|----------------------------|-----------------------------------|--------------|--------------------------------|
| P63018           | HSP7C_RAT                  | Heat shock cognate 71 kDa protein | 83           | 2                              |

doi:10.1371/journal.pone.0048337.t011

above). This protein binds to nascent polypeptides to facilitate correct protein folding. It also functions as an ATPase in the disassembly of clathrin coated vesicles during transport of membrane components through the cell. On the other hand, another member of the HSP70 family, HSP70, which is known to act as an anti-apoptotic chaperone, had higher levels in the hippocampus of the RER pups. Furthermore, in the DER pups, HSP70 showed a lateralized distribution, with higher levels in the right compared to the left hippocampus.

Proteins involved in detoxification of oxygen reactive species, such as superoxide dismutase and protein DJ-1, mutations of which have been identified in patients with amyotrophic lateral sclerosis or Parkinsons disease, respectively, were found in our study to show differences in their levels between the experimental

groups. More specifically, protein DJ-1, whose levels were found to be decreased following maternal separation [9], was up-regulated in the left hippocampus of the pups exposed to either of the two early experiences (DER or RER). Since DJ-1 protein has been proposed to act against dopamine toxicity [64], our finding could indicate that exposure to the early experiences of our model might have a neuroprotective effect on the developing dopaminergic system.

Signal transduction pathways are key players in developmental and plasticity-related processes, and thus the levels of the proteins involved in these pathways, such as 14-3-3, have been found to be altered after maternal separation [8], or chronic stress [51] in the rat hippocampus and cortex, as well as in post mortem brain from schizophrenic patients [53,65]. In analogy with these studies we

**Table 12.** Proteins (27) with higher levels in the Right Hippocampus (RH) of the RER compared to those of the DER.

| Accession number | Protein ID from Swiss Prot | Protein name                                                    | Mascot Score | Levels in RER<br>Levels in DER |
|------------------|----------------------------|-----------------------------------------------------------------|--------------|--------------------------------|
| Q9ER34           | ACON_RAT                   | Aconitate hydratase, mitochondrial                              | 283          | 4                              |
| P60711           | ACTB_RAT                   | Actin, cytoplasmic 1                                            | 126          | 3                              |
| P63259           | ACTG_RAT                   | Actin, cytoplasmic 2                                            | 126          | 3                              |
| P10719           | ATPB_RAT                   | ATP synthase subunit beta, mitochondrial                        | 226          | 3                              |
| Q3T1K5           | CAZA2_RAT                  | F-actin-capping protein subunit alpha-2                         | 64           | 3                              |
| P10860           | DHE3_RAT                   | Glutamate dehydrogenase 1, mitochondrial                        | 172          | 3                              |
| Q62950           | DPYL1_RAT                  | Dihydropyrimidinase-related protein 1                           | 74           | 2                              |
| P47942           | DPYL2_RAT                  | Dihydropyrimidinase-related protein 2                           | 222          | 935                            |
| Q62951           | DPYL4_RAT                  | Dihydropyrimidinase-related protein 4                           | 135          | 3                              |
| Q9JHU0           | DPYL5_RAT                  | Dihydropyrimidinase-related protein 5                           | 107          | 3                              |
| P07323           | ENOG_RAT                   | Gamma-enolase                                                   | 220          | 5                              |
| Q5XI73           | GDIR1_RAT                  | Rho GDP-dissociation inhibitor 1                                | 96           | 38                             |
| Q66HA8           | HS105_RAT                  | Heat shock protein 105 kDa                                      | 99           | 4                              |
| O88600           | HSP74_RAT                  | Heat shock 70 kDa protein 4                                     | 147          | 4                              |
| P07335           | KCRB_RAT                   | Creatine kinase B-type                                          | 176          | 16                             |
| P11980           | KPYM_RAT                   | Pyruvate kinase isozymes M1/M2                                  | 214          | 10                             |
| P42123           | LDHB_RAT                   | L-lactate dehydrogenase B chain                                 | 170          | 3                              |
| O88989           | MDHC_RAT                   | Malate dehydrogenase, cytoplasmic                               | 67           | 3                              |
| Q05982           | NDKA_RAT                   | Nucleoside diphosphate kinase A                                 | 94           | 183                            |
| P19527           | NFL_RAT                    | Neurofilament light polypeptide                                 | 126          | 585                            |
| Q9QUL6           | NSF_RAT                    | Vesicle-fusing ATPase                                           | 96           | 1870                           |
| P31044           | PEBP1_RAT                  | Phosphatidylethanolamine-binding protein 1                      | 55           | 2                              |
| O35567           | PUR9_RAT                   | Bifunctional purine biosynthesis protein PURH                   | 53           | 437                            |
| P38983           | RSSA_RAT                   | 40S ribosomal protein SA                                        | 176          | 1436                           |
| B2GV06           | SCOT1_RAT                  | Succinyl-CoA:3-ketoacid-coenzyme A transferase 1, mitochondrial | 109          | 2                              |
| P46462           | TERA_RAT                   | Transitional endoplasmic reticulum ATPase                       | 214          | 3                              |
| Q00981           | UCHL1_RAT                  | Ubiquitin carboxyl-terminal hydrolase isozyme L1                | 126          | 4                              |

doi:10.1371/journal.pone.0048337.t012

**Table 13.** Proteins (25) with higher levels in the Left Hippocampus (LH) compared to those in the Right Hippocampus (RH) of the CTR.

| Accession number | Protein ID from Swiss Prot | Protein name                                                    | Mascot Score | Levels in LH of the CTR<br>Levels in RH of the CTR |
|------------------|----------------------------|-----------------------------------------------------------------|--------------|----------------------------------------------------|
| Q9ER34           | ACON_RAT                   | Aconitate hydratase, mitochondrial                              | 95           | 730                                                |
| P60711           | ACTB_RAT                   | Actin, cytoplasmic 1*                                           | 109          | 18                                                 |
| P63259           | ACTG_RAT                   | Actin, cytoplasmic 2                                            | 109          | 18                                                 |
| P23565           | AINX_RAT                   | Alpha-internexin*                                               | 243          | 22                                                 |
| P62161           | CALM_RAT                   | Calmodulin                                                      | 71           | 2756                                               |
| Q91ZN1           | COR1A_RAT                  | Coronin-1A                                                      | 113          | 5820                                               |
| P10860           | DHE3_RAT                   | Glutamate dehydrogenase 1, mitochondrial                        | 153          | 10                                                 |
| Q62952           | DPYL3_RAT                  | Dihydropyrimidinase-related protein 3*                          | 161          | 20                                                 |
| P54311           | GBB1_RAT                   | Guanine nucleotide-binding protein G(i)/G(s)/G(t) subunit beta* | 65           | 146                                                |
| P82995           | HS90A_RAT                  | Heat shock protein HSP 90-alpha                                 | 82           | 1097                                               |
| P34058           | HS90B_RAT                  | Heat shock protein HSP 90-beta                                  | 121          | 1097                                               |
| P63018           | HSP7C_RAT                  | Heat shock cognate 71 kDa protein                               | 63           | 31                                                 |
| P07335           | KCRB_RAT                   | Creatine kinase B-type*                                         | 58           | 73809                                              |
| P11598           | PDIA3_RAT                  | Protein disulfide-isomerase A3                                  | 167          | 21                                                 |
| P38983           | RSSA_RAT                   | 40S ribosomal protein SA                                        | 121          | 5                                                  |
| B2GV06           | SCOT1_RAT                  | Succinyl-CoA:3-ketoacid-coenzyme A transferase 1, mitochondrial | 58           | 19                                                 |
| P68370           | TBA1A_RAT                  | Tubulin alpha-1A chain*                                         | 175          | 6                                                  |
| Q6P9V9           | TBA1B_RAT                  | Tubulin alpha-1B chain*                                         | 103          | 20                                                 |
| Q6AYZ1           | TBA1C_RAT                  | Tubulin alpha-1C chain                                          | 68           | 146                                                |
| Q68FR8           | TBA3_RAT                   | Tubulin alpha-3 chain                                           | 77           | 20                                                 |
| Q5XIF6           | TBA4A_RAT                  | Tubulin alpha-4A chain                                          | 54           | 19                                                 |
| Q5XIM9           | TCPB_RAT                   | T-complex protein 1 subunit beta                                | 132          | 4                                                  |
| P46462           | TERA_RAT                   | Transitional endoplasmic reticulum ATPase                       | 269          | 513                                                |
| Q63610           | TPM3_RAT                   | Tropomyosin alpha-3 chain                                       | 91           | 3                                                  |
| P62815           | VATB2_RAT                  | V-type proton ATPase subunit B, brain isoform*                  | 235          | 6                                                  |

\*Proteins showing reversed asymmetry of expression (right over left) in the adult hippocampus.  
doi:10.1371/journal.pone.0048337.t013

found that the levels of 14-3-3 protein were higher in the left hippocampus of the RER compared to that of the DER. Furthermore 14-3-3 had higher levels in the left hippocampus of the CTR pups compared to the right, in support of the view that there were more development- and plasticity-related processes occurring in the left than the right hippocampus (see above). Notably 14-3-3 proteins, in addition to signal transduction, are

involved in cell division, differentiation and apoptosis. Furthermore they have been shown to interact with the cytoskeleton in mediating neuronal plasticity [66].

It is worth viewing our results regarding the CTR 13-day-old rat pups in relation to the findings of Samara et al. [30] who investigated, using a proteomics approach, the lateralized protein expression in the adult rat hippocampus. Thirteen of the proteins

**Table 14.** Proteins (7) with higher levels in the Right Hippocampus (RH) compared to those in the Left Hippocampus (LH) of the CTR.

| Accession number | Protein ID from Swiss Prot | Protein name                               | Mascot Score | Levels in RH of the CTR<br>Levels in LH of the CTR |
|------------------|----------------------------|--------------------------------------------|--------------|----------------------------------------------------|
| P62161           | CALM_RAT                   | Calmodulin                                 | 85           | 11                                                 |
| Q62950           | DPYL1_RAT                  | Dihydropyrimidinase-related protein 1      | 141          | 5                                                  |
| P85845           | FSCN1_RAT                  | Fascin                                     | 183          | 828                                                |
| Q5XI73           | GDIR1_RAT                  | Rho GDP-dissociation inhibitor 1           | 137          | 12                                                 |
| Q6DGG0           | PPID_RAT                   | 40 kDa peptidyl-prolyl cis-trans isomerase | 72           | 3                                                  |
| P35704           | PRDX2_RAT                  | Peroxiredoxin-2                            | 54           | 4                                                  |
| P31000           | VIME_RAT                   | Vimentin                                   | 206          | 3                                                  |

doi:10.1371/journal.pone.0048337.t014

**Table 15.** Proteins (24) with higher levels in the Left Hippocampus (LH) compared to those in the Right Hippocampus (RH) of the DER.

| Accession number | Protein ID from Swiss Prot | Protein name                                                    | Mascot Score | Levels in LH of the DER<br>Levels in RH of the DER |
|------------------|----------------------------|-----------------------------------------------------------------|--------------|----------------------------------------------------|
| P60711           | ACTB_RAT                   | Actin, cytoplasmic 1                                            | 70           | 2273                                               |
| P63259           | ACTG_RAT                   | Actin, cytoplasmic 2                                            | 70           | 2273                                               |
| Q9ER34           | ACON_RAT                   | Aconitate hydratase, mitochondrial                              | 56           | 128                                                |
| Q6P6R2           | DLDH_RAT                   | Dihydrolipoyl dehydrogenase, mitochondrial                      | 54           | 5                                                  |
| Q62952           | DPYL3_RAT                  | Dihydropyrimidinase-related protein 3                           | 89           | 5                                                  |
| P85834           | EFTU_RAT                   | Elongation factor Tu, mitochondrial                             | 118          | 594                                                |
| P63018           | HSP7C_RAT                  | Heat shock cognate 71 kDa protein                               | 231          | 941                                                |
| P19527           | NFL_RAT                    | Neurofilament light polypeptide                                 | 107          | 3                                                  |
| P12839           | NFM_RAT                    | Neurofilament medium polypeptide                                | 173          | 4                                                  |
| P11598           | PDIA3_RAT                  | Protein disulfide-isomerase A3                                  | 112          | 20                                                 |
| B2GV06           | SCOT1_RAT                  | Succinyl-CoA:3-ketoacid-coenzyme A transferase 1, mitochondrial | 61           | 489                                                |
| O35814           | STIP1_RAT                  | Stress-induced-phosphoprotein 1                                 | 115          | 6                                                  |
| P16086           | SPTA2_RAT                  | Spectrin alpha chain, brain                                     | 232          | 785                                                |
| P68370           | TBA1A_RAT                  | Tubulin alpha-1A chain                                          | 173          | 76                                                 |
| Q6P9V9           | TBA1B_RAT                  | Tubulin alpha-1B chain                                          | 173          | 76                                                 |
| Q6AYZ1           | TBA1C_RAT                  | Tubulin alpha-1C chain                                          | 139          | 76                                                 |
| Q68FR8           | TBA3_RAT                   | Tubulin alpha-3 chain                                           | 126          | 76                                                 |
| Q5XIF6           | TBA4A_RAT                  | Tubulin alpha-4A chain                                          | 141          | 76                                                 |
| P85108           | TBB2A_RAT                  | Tubulin beta-2A chain                                           | 191          | 242                                                |
| Q3KRE8           | TBB2B_RAT                  | Tubulin beta-2B chain                                           | 191          | 242                                                |
| Q6P9T8           | TBB2C_RAT                  | Tubulin beta-2C chain                                           | 142          | 242                                                |
| Q4QRB4           | TBB3_RAT                   | Tubulin beta-3 chain                                            | 97           | 242                                                |
| P69897           | TBB5_RAT                   | Tubulin beta-5 chain                                            | 174          | 242                                                |

doi:10.1371/journal.pone.0048337.t015

whose expression differed between the two hippocampi of the control pups also showed lateralized expression in the adult hippocampus. However, in our work the majority of proteins differentially expressed were more abundantly expressed in the left hippocampus, while the opposite was shown by Samara et al. (2011) in the adult rat hippocampus: Many more proteins were highly expressed in the right hippocampus, and fewer in the left [30]. More specifically, the left over right asymmetry in expression found at 13 days of age was maintained into adulthood only for three proteins (HSP 90- $\alpha$ , HSP 90- $\beta$  and Transitional endoplasmic

reticulum ATPase), while only one (Rho GDP-dissociation inhibitor 1) showed a right over left asymmetry in expression in both the neonatal and adult hippocampus. Interestingly, for the majority of proteins (9) asymmetrically expressed both in the 13-day-old and adult hippocampus, the asymmetry in their expression was reversed: For 8 proteins up-regulation was found in the left 13-day-old hippocampus, while in the adult in the right (Table 13), and for only one protein (Peroxisome oxidoreductin 2), it was *vice versa*. This shift from left over right to right over left asymmetry in protein expression could reflect developmental changes in laterality,

**Table 16.** Proteins (7) with higher levels in the Right Hippocampus (RH) compared to those in the Left Hippocampus (LH) of the DER.

| Accession number | Protein ID from Swiss Prot | Protein name                          | Mascot Score | Levels in RH of the DER<br>Levels in LH of the DER |
|------------------|----------------------------|---------------------------------------|--------------|----------------------------------------------------|
| P62161           | CALM_RAT                   | Calmodulin                            | 77           | 4                                                  |
| Q62951           | DPYL4_RAT                  | Dihydropyrimidinase-related protein 4 | 179          | 1605                                               |
| Q9JHU0           | DPYL5_RAT                  | Dihydropyrimidinase-related protein 5 | 135          | 1605                                               |
| P31977           | EZRI_RAT                   | Ezrin                                 | 67           | 8                                                  |
| O88600           | HSP74_RAT                  | Heat shock 70 kDa protein 4           | 101          | 108                                                |
| O88989           | MDHC_RAT                   | Malate dehydrogenase, cytoplasmic     | 82           | 2                                                  |
| P85972           | VINC_RAT                   | Vinculin                              | 103          | 6                                                  |

doi:10.1371/journal.pone.0048337.t016

**Table 17.** Proteins (18) with higher levels in the Left Hippocampus (LH) compared to those in the Right Hippocampus (RH) of the RER.

| Accession number | Protein ID from Swiss Prot | Protein name                                                   | Mascot Score | Levels in LH of the RER<br>Levels in RH of the RER |
|------------------|----------------------------|----------------------------------------------------------------|--------------|----------------------------------------------------|
| P23565           | AINX_RAT                   | Alpha-internexin                                               | 220          | 20                                                 |
| P18418           | CALR_RAT                   | Calreticulin                                                   | 166          | 16                                                 |
| B0BNA5           | COTL1_RAT                  | Coactosin-like protein                                         | 71           | 3                                                  |
| P85845           | FSCN1_RAT                  | Fascin                                                         | 163          | 2                                                  |
| P54311           | GBB1_RAT                   | Guanine nucleotide-binding protein G(I)/G(S)/G(T) subunit beta | 75           | 6667                                               |
| P50398           | GDIA_RAT                   | Rab GDP dissociation inhibitor alpha                           | 199          | 3755                                               |
| P82995           | HS90A_RAT                  | Heat shock protein HSP 90-alpha                                | 66           | 4                                                  |
| P34058           | HS90B_RAT                  | Heat shock protein HSP 90-beta                                 | 105          | 4                                                  |
| P63018           | HSP7C_RAT                  | Heat shock cognate 71 kDa protein                              | 90           | 4                                                  |
| P19527           | NFL_RAT                    | Neurofilament light polypeptide                                | 174          | 8                                                  |
| Q6AY84           | SCRN1_RAT                  | Secernin-1                                                     | 94           | 109                                                |
| P16086           | SPTA2_RAT                  | Spectrin alpha chain, brain                                    | 56           | 370                                                |
| P68370           | TBA1A_RAT                  | Tubulin alpha-1A chain                                         | 98           | 2                                                  |
| Q6P9V9           | TBA1B_RAT                  | Tubulin alpha-1B chain                                         | 160          | 16536                                              |
| Q6AYZ1           | TBA1C_RAT                  | Tubulin alpha-1C chain                                         | 128          | 16536                                              |
| Q68FR8           | TBA3_RAT                   | Tubulin alpha-3 chain                                          | 117          | 16536                                              |
| Q5XIF6           | TBA4A_RAT                  | Tubulin alpha-4A chain                                         | 145          | 16536                                              |
| Q68FQ0           | TCPE_RAT                   | T-complex protein 1 subunit epsilon                            | 71           | 1986                                               |

doi:10.1371/journal.pone.0048337.t017

previously shown to occur at the level of gene expression by Moskal et al. [33]. Notably in humans the right cortex develops before the left [67] and a right to left shift in cortical hemispheric asymmetry seems to occur during development: Visuospatial and language abilities, which are localized in the left hemisphere in the adult, have been shown to be localized in the right in infants [68]. An analogous developmental left to right shift could occur in the rat hippocampus, with regard to protein expression, which would account for the difference between our results and those of Samara et al [30]. Such a developmental shift in hippocampal asymmetry would also explain the discrepancy between our results showing a left “dominance” as to the levels of proteins expressed in the 13-

day-old hippocampus, while in other studies the long-term effects of early experiences on adult brain laterality show primarily a right hemispheric bias [37,41,43,44].

In conclusion our study shows that protein expression is lateralized in the hippocampus of 13-day-old rat pups and most of the proteins are up-regulated in the left hippocampus. The majority of proteins whose levels differ either between the two hemispheres or between the three experimental groups are cytoskeletal or enzymes involved in energy metabolism. However we also detected differences in the levels of certain proteins that, because of their critical role in neuronal function, seem to be susceptible to changes in expression levels, such as for example the

**Table 18.** Proteins (10) with higher levels in the Right Hippocampus (RH) compared to those in the Left Hippocampus (LH) of the RER.

| Accession number | Protein ID from Swiss Prot | Protein name                                                                              | Mascot Score | Levels in RH of the RER<br>Levels in LH of the RER |
|------------------|----------------------------|-------------------------------------------------------------------------------------------|--------------|----------------------------------------------------|
| Q05175           | BASP1_RAT                  | Brain acid soluble protein 1                                                              | 58           | 52                                                 |
| P86182           | CCD22_RAT                  | Coiled-coil domain-containing protein 22                                                  | 61           | 8                                                  |
| P63039           | CH60_RAT                   | 60 kDa heat shock protein, mitochondrial                                                  | 112          | 8                                                  |
| P08082           | CLCB_RAT                   | Clathrin light chain B                                                                    | 78           | 2                                                  |
| Q62950           | DPYL1_RAT                  | Dihydropyrimidinase-related protein 1                                                     | 138          | 4                                                  |
| Q62951           | DPYL4_RAT                  | Dihydropyrimidinase-related protein 4                                                     | 192          | 9                                                  |
| Q9JHU0           | DPYL5_RAT                  | Dihydropyrimidinase-related protein 5                                                     | 130          | 9                                                  |
| P31977           | EZRI_RAT                   | Ezrin                                                                                     | 62           | 2                                                  |
| P08461           | ODP2_RAT                   | Dihydrolipoyllysine-residue acetyltransferase component of pyruvate dehydrogenase complex | 71           | 4                                                  |
| P85972           | VINC_RAT                   | Vinculin                                                                                  | 70           | 117                                                |

doi:10.1371/journal.pone.0048337.t018

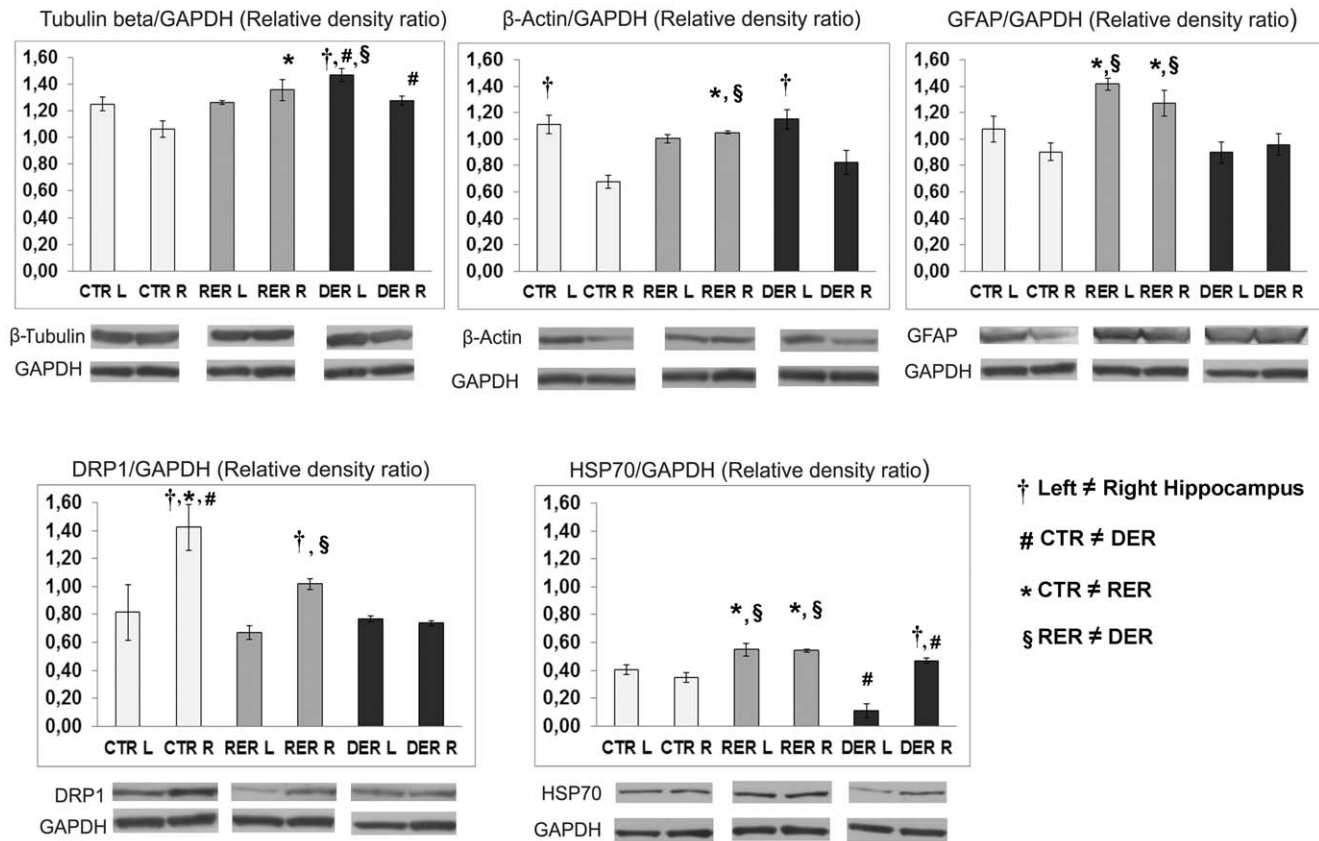

**Figure 2. Western blot analysis of selected proteins found by the proteomic analysis to be differentially expressed.** Bars represent normalized (vs GAPDH) protein levels (Mean ± S.E.M.). Symbols denote statistically significant differences. doi:10.1371/journal.pone.0048337.g002

DRPs, the HSPs, or protein 14-3-3. The levels of these proteins have also been shown to be modified following maternal deprivation, another model of early experience.

Interestingly, our work is the first to show that an early experience can alter the degree of hippocampal laterality in protein levels: In the control pups (CTR) the ratio of the number of proteins up-regulated as well as that of the level of protein expression in the left hippocampus to that in the right were  $25/7 = 3.6$  and  $6$  respectively. The values of the above described ratios were found for the pups denied the expected reward (DER) to be similar to those of the controls ( $24/7 = 3.4$  for the number of up-regulated proteins and  $4.7$  for the levels of protein expression). However, for the pups receiving the expected reward (RER) the left to right ratio of the up-regulated proteins was about half ( $18/10 = 1.8$ ) of that of the controls and the DER, while the ratio of

protein expression levels was even lower, approximately less than  $1/4$  of that of the other two groups ( $1.1$ ). These results demonstrate that the RER pups exhibited less left to right asymmetry. If during development there is a shift from left to right hippocampal dominance regarding protein expression, as suggested above, the lower degree of laterality in the RER pups could be an indication that the RER experience involving receipt of the expected reward of maternal contact accelerated this developmental shift.

## Author Contributions

Conceived and designed the experiments: FS GTT. Performed the experiments: AR AS AP KV AKA. Analyzed the data: AR AS AP KV AKA FS GTT. Wrote the paper: FS AR AS GTT.

## References

- Pechtel P, Pizzagalli DA (2011) Effects of early life stress on cognitive and affective function: an integrated review of human literature. *Psychopharmacology (Berl)* 214: 55–70.
- Heim C, Shugart M, Craighead WE, Nemeroff CB (2010) Neurobiological and psychiatric consequences of child abuse and neglect. *Dev Psychobiol* 52: 671–690.
- Pryce CR, Ruedi-Bettschen D, Dettling AC, Weston A, Russig H, et al. (2005) Long-term effects of early-life environmental manipulations in rodents and primates: Potential animal models in depression research. *Neurosci Biobehav Rev* 29: 649–674.
- Lehmann J, Pryce CR, Bettschen D, Feldon J (1999) The maternal separation paradigm and adult emotionality and cognition in male and female Wistar rats. *Pharmacol Biochem Behav* 64: 705–715.
- Panagiotaropoulos T, Diamantopoulou A, Stamatakis A, Dimitropoulou M, Stylianopoulou F (2009) Learning of a T-maze by rat pups when contact with the mother is either permitted or denied. *Neurobiol Learn Mem* 91: 2–12.
- Diamantopoulou A, Stamatakis A, Panagiotaropoulos T, Stylianopoulou F (2011) Reward or its denial during the neonatal period affects adult spatial memory and hippocampal phosphorylated cAMP response element-binding protein levels of both the neonatal and adult rat. *Neuroscience* 181: 89–99.
- Raftogianni A, Diamantopoulou A, Alikaridis F, Stamatakis A, Stylianopoulou F (2012) Effects of interaction of an early experience of reward through maternal contact or its denial with social stress during adolescence on the serotonergic system and the stress responsiveness of adult female rats. *Neuroscience*.
- Piubelli C, Carboni L, Becchi S, Mathe AA, Domenici E (2011) Regulation of cytoskeleton machinery, neurogenesis and energy metabolism pathways in a rat gene-environment model of depression revealed by proteomic analysis. *Neuroscience* 176: 349–380.

9. Marais L, Hattingh SM, Stein DJ, Daniels WM (2009) A proteomic analysis of the ventral hippocampus of rats subjected to maternal separation and escitalopram treatment. *Metab Brain Dis* 24: 569–586.
10. Diamantopoulou A, Raftogianni A, Stamatakis A, Alikaridis F, Oitzl MS, et al. (2012) Denial of reward in the neonate shapes sociability and serotonergic activity in the adult rat. *PLoS One* 7: e33793.
11. Bianki VL (1981) Lateralization of functions in the animal brain. *Int J Neurosci* 15: 37–47.
12. Gannon PJ, Holloway RL, Broadfield DC, Braun AR (1998) Asymmetry of chimpanzee planum temporale: humanlike pattern of Wernicke's brain language area homolog. *Science* 279: 220–222.
13. Sullivan RM, Gratton A (2002) Prefrontal cortical regulation of hypothalamic-pituitary-adrenal function in the rat and implications for psychopathology: side matters. *Psychoneuroendocrinology* 27: 99–114.
14. Bingman VP, Gagliardo A (2006) Of birds and men: convergent evolution in hippocampal lateralization and spatial cognition. *Cortex* 42: 99–100.
15. Knecht S, Dräger B, Deppe M, Bobe L, Lohmann H, et al. (2000) Handedness and hemispheric language dominance in healthy humans. *Brain* 123 Pt 12: 2512–2518.
16. Geschwind N, Levitsky W (1968) Human brain: left-right asymmetries in temporal speech region. *Science* 161: 186–187.
17. Woolard AA, Heckers S (2012) Anatomical and functional correlates of human hippocampal volume asymmetry. *Psychiatry Res* 211: 48–53.
18. Hanlon FM, Weisend MP, Yeo RA, Huang M, Lee RR, et al. (2005) A specific test of hippocampal deficit in schizophrenia. *Behav Neurosci* 119: 863–875.
19. Qiu A, Wang L, Younes L, Harms MP, Ratnanather JT, et al. (2009) Neuroanatomical asymmetry patterns in individuals with schizophrenia and their non-psychotic siblings. *Neuroimage* 47: 1221–1229.
20. Chiron C, Leboyer M, Leon F, Jambaque I, Nuttin C, et al. (1995) SPECT of the brain in childhood autism: evidence for a lack of normal hemispheric asymmetry. *Dev Med Child Neurol* 37: 849–860.
21. Guarneri P, Guarneri R, La Bella V, Scodotto S, Scoppa F, et al. (1988) Lateral differences in GABA binding sites in rat brain. *Neurochem Res* 13: 209–211.
22. Oke A, Lewis R, Adams RN (1980) Hemispheric asymmetry of norepinephrine distribution in rat thalamus. *Brain Res* 188: 269–272.
23. Afonso D, Santana C, Rodriguez M (1993) Neonatal lateralization of behavior and brain dopaminergic asymmetry. *Brain Res Bull* 32: 11–16.
24. Schneider LH, Murphy RB, Coons EE (1982) Lateralization of striatal dopamine (D2) receptors in normal rats. *Neurosci Lett* 33: 281–284.
25. Kristofikova Z, Stastny F, Bubenikova V, Druga R, Klaschka J, et al. (2004) Age- and sex-dependent laterality of rat hippocampal cholinergic system in relation to animal models of neurodevelopmental and neurodegenerative disorders. *Neurochem Res* 29: 671–680.
26. Kawakami R, Shinohara Y, Kato Y, Sugiyama H, Shigemoto R, et al. (2003) Asymmetrical allocation of NMDA receptor epsilon2 subunits in hippocampal circuitry. *Science* 300: 990–994.
27. Ginobili de Martinez MS, Rodriguez de Turco EB, Barrantes FJ (1986) Asymmetry of diacylglycerol metabolism in rat cerebral hemispheres. *J Neurochem* 46: 1382–1386.
28. Ginobili de Martinez MS, Rodriguez de Turco EB, Barrantes FJ (1985) Endogenous asymmetry of rat brain lipids and dominance of the right cerebral hemisphere in free fatty acid response to electroconvulsive shock. *Brain Res* 339: 315–321.
29. Orman R, Stewart M (2007) Hemispheric differences in protein kinase C betaII levels in the rat amygdala: baseline asymmetry and lateralized changes associated with cue and context in a classical fear conditioning paradigm. *Neuroscience* 144: 797–807.
30. Samara A, Vougas K, Papadopoulou A, Anastasiadou E, Baloyanni N, et al. (2011) Proteomics reveal rat hippocampal lateral asymmetry. *Hippocampus* 21: 108–119.
31. Sun T, Walsh CA (2006) Molecular approaches to brain asymmetry and handedness. *Nature reviews Neuroscience* 7: 655–662.
32. Sun T, Patoine C, Abu-Khalil A, Visvader J, Sum E, et al. (2005) Early asymmetry of gene transcription in embryonic human left and right cerebral cortex. *Science* 308: 1794–1798.
33. Diamond MC, Johnson RE, Young D, Singh SS (1983) Age-related morphologic differences in the rat cerebral cortex and hippocampus: male-female; right-left. *Exp Neurol* 81: 1–13.
34. Moskal JR, Kroes RA, Otto NJ, Rahimi O, Claiborne BJ (2006) Distinct patterns of gene expression in the left and right hippocampal formation of developing rats. *Hippocampus* 16: 629–634.
35. Denenberg VH, Garbanati J, Sherman DA, Yutzey DA, Kaplan R (1978) Infantile stimulation induces brain lateralization in rats. *Science* 201: 1150–1152.
36. Denenberg VH (1981) Hemispheric laterality in animals and the effects of early experience. *Behav Brain Sci* 4: 1–49.
37. Sullivan RM, Dufresne MM (2006) Mesocortical dopamine and HPA axis regulation: role of laterality and early environment. *Brain Res* 1076: 49–59.
38. Stevenson CW, Halliday DM, Marsden CA, Mason R (2008) Early life programming of hemispheric lateralization and synchronization in the adult medial prefrontal cortex. *Neuroscience* 155: 852–863.
39. Verstynen T, Tierney R, Urbanski T, Tang A (2001) Neonatal novelty exposure modulates hippocampal volumetric asymmetry in the rat. *Neuroreport* 12: 3019–3022.
40. Tang AC, Verstynen T (2002) Early life environment modulates 'handedness' in rats. *Behav Brain Res* 131: 1–7.
41. Tang AC, Reeb BC (2004) Neonatal novelty exposure, dynamics of brain asymmetry, and social recognition memory. *Dev Psychobiol* 44: 84–93.
42. Tang AC, Nakazawa M, Reeb BC (2003) Neonatal novelty exposure affects sex difference in open field disinhibition. *Neuroreport* 14: 1553–1556.
43. Tang AC, Reeb-Sutherland B, Yang Z (2011) Functional brain asymmetry in adult novelty response: on fluidity of neonatal novelty exposure effects. *Behav Brain Res* 221: 91–97.
44. Tang AC, Zou B, Reeb BC, Connor JA (2008) An epigenetic induction of a right-shift in hippocampal asymmetry: selectivity for short- and long-term potentiation but not post-tetanic potentiation. *Hippocampus* 18: 5–10.
45. Duque A, Coman D, Carlyle BC, Bordner KA, George ED, et al. (2012) Neuroanatomical changes in a mouse model of early life neglect. *Brain Struct Funct* 217: 459–472.
46. Champagne FA, Francis DD, Mar A, Meaney MJ (2003) Variations in maternal care in the rat as a mediating influence for the effects of environment on development. *Physiol Behav* 79: 359–371.
47. Fountoulakis M, Tsangaris GT, Maris A, Lubec G (2005) The rat brain hippocampus proteome. *J Chromatogr B Analyt Technol Biomed Life Sci* 819: 115–129.
48. Koenig T, Menze BH, Kirchner M, Monigatti F, Parker KC, et al. (2008) Robust prediction of the MASCOT score for an improved quality assessment in mass spectrometric proteomics. *Journal of proteome research* 7: 3708–3717.
49. Perkins DN, Pappin DJ, Creasy DM, Cottrell JS (1999) Probability-based protein identification by searching sequence databases using mass spectrometry data. *Electrophoresis* 20: 3551–3567.
50. Uys JD, Hattingh SM, Stein DJ, Daniels WM (2008) Large scale hippocampal cellular distress may explain the behavioral consequences of repetitive traumatic experiences—a proteomic approach. *Neurochem Res* 33: 1724–1734.
51. Carboni L, Piubelli C, Pozzato C, Astner H, Arban R, et al. (2006) Proteomic analysis of rat hippocampus after repeated psychosocial stress. *Neuroscience* 137: 1237–1246.
52. Yang C, Wang G, Wang H, Liu Z, Wang X (2009) Cytoskeletal alterations in rat hippocampus following chronic unpredictable mild stress and re-exposure to acute and chronic unpredictable mild stress. *Behav Brain Res* 205: 518–524.
53. English JA, Dicker P, Focking M, Dunn MJ, Cotter DR (2009) 2-D DIGE analysis implicates cytoskeletal abnormalities in psychiatric disease. *Proteomics* 9: 3368–3382.
54. Johnston-Wilson NL, Sims CD, Hofmann JP, Anderson L, Shore AD, et al. (2000) Disease-specific alterations in frontal cortex brain proteins in schizophrenia, bipolar disorder, and major depressive disorder. The Stanley Neuropathology Consortium. *Mol Psychiatry* 5: 142–149.
55. Parker KC, Walsh RJ, Salajegheh M, Amato AA, Krastins B, et al. (2009) Characterization of human skeletal muscle biopsy samples using shotgun proteomics. *J Proteome Res* 8: 3265–3277.
56. Essner JJ, Amack JD, Nyholm MK, Harris EB, Yost HJ (2005) Kupffer's vesicle is a ciliated organ of asymmetry in the zebrafish embryo that initiates left-right development of the brain, heart and gut. *Development* 132: 1247–1260.
57. Bianchi M, Fone KC, Shah AJ, Atkins AR, Dawson LA, et al. (2009) Chronic fluoxetine differentially modulates the hippocampal microtubular and serotonergic system in grouped and isolation reared rats. *Eur Neuropsychopharmacol* 19: 778–790.
58. Bianchi M, Heidbreder C, Crespi F (2003) Cytoskeletal changes in the hippocampus following restraint stress: role of serotonin and microtubules. *Synapse* 49: 188–194.
59. Beasley CL, Pennington K, Behan A, Wait R, Dunn MJ, et al. (2006) Proteomic analysis of the anterior cingulate cortex in the major psychiatric disorders: Evidence for disease-associated changes. *Proteomics* 6: 3414–3425.
60. Guest PC, Knowles MR, Molon-Noblot S, Salim K, Smith D, et al. (2004) Mechanisms of action of the antidepressants fluoxetine and the substance P antagonist L-000760735 are associated with altered neurofilaments and synaptic remodeling. *Brain Res* 1002: 1–10.
61. Eng LF, Ghimikar RS, Lee YL (2000) Glial fibrillary acidic protein: GFAP-thirty-one years (1969–2000). *Neurochem Res* 25: 1439–1451.
62. Szego EM, Janaky T, Szabo Z, Csorba A, Kompagne H, et al. (2010) A mouse model of anxiety molecularly characterized by altered protein networks in the brain proteome. *Eur Neuropsychopharmacol* 20: 96–111.
63. Moretti A, Gorini A, Villa RF (2003) Affective disorders, antidepressant drugs and brain metabolism. *Mol Psychiatry* 8: 773–785.
64. Lev N, Ickowicz D, Barhum Y, Lev S, Melamed E, et al. (2009) DJ-1 protects against dopamine toxicity. *J Neural Transm* 116: 151–160.
65. Altar CA, Vavter MP, Ginsberg SD (2009) Target identification for CNS diseases by transcriptional profiling. *Neuropsychopharmacology* 34: 18–54.
66. Sun L, Bittner MA, Holz RW (2003) Rim, a component of the presynaptic active zone and modulator of exocytosis, binds 14-3-3 through its N terminus. *J Biol Chem* 278: 38301–38309.
67. Geschwind N, Galaburda AM (1985) Cerebral lateralization. Biological mechanisms, associations, and pathology: I. A hypothesis and a program for research. *Arch Neurol* 42: 428–459.
68. Chiron C, Jambaque I, Nabbout R, Lounes R, Syrota A, et al. (1997) The right brain hemisphere is dominant in human infants. *Brain* 120 (Pt 6): 1057–1065.
